# Supplementary material for: Identification of fluoroquinolone-resistant Mycobacterium tuberculosis through high-level data fusion of Raman and laser-induced breakdown spectroscopy
Source: Royal Society of Chemistry journal article supplement (doi:10.1039/d4ay01331j), 2024-01-01
Supplement: d4ay01331j2.pdf [file d4ay01331j2.pdf]

## Supplementary material

**Title:** Identification of fluoroquinolone-resistant *Mycobacterium tuberculosis* through high-level data fusion of Raman and laser-induced breakdown spectroscopy

Gookseon Jeon<sup>a,b,1</sup>, Soogeun Kim<sup>c,1</sup>, Young Jin Kim<sup>d</sup>, Seungmo Kim<sup>e</sup>, Kyungmin Han<sup>f</sup>,  
Kyunghwan Oh<sup>b</sup>, Hee Joo Lee<sup>f,\*</sup>, Janghee Choi<sup>a,\*</sup>

<sup>a</sup> Industrial Transformation Technology Department, Research Institute of Sustainable Development Technology, 89, Yangdaegiro-gil, Ipjang-myeon, Seobuk-gu, Cheonan-Si, Chungcheongnam-do 31056, Republic of Korea

<sup>b</sup> Photonic Device Physics Laboratory, Institute of Physics and Applied Physics, Yonsei University, 50, Yonsei-ro, Seodaemun-gu, Seoul 03722, Republic of Korea

<sup>c</sup> Advanced Photonics Research Institute (APRI), Gwangju Institute of Science and Technology (GIST), Gwangju 61005, Republic of Korea

<sup>d</sup> Department of Laboratory Medicine, Kyung Hee University College of Medicine, Kyung Hee University Hospital, Seoul, Republic of Korea

<sup>e</sup> Laboratory Medicine Center, Korean National Tuberculosis Association · The Korean Institute of Tuberculosis, Cheongju, Republic of Korea

<sup>f</sup> Clinical Laboratory Medicine Center, Korean National Tuberculosis Association, Seoul, Republic of Korea

<sup>1</sup> These authors equally contribute

**\*Correspondence:**

Hee Joo Lee, Korean National Tuberculosis Association, Seoul 06763, South Korea

E-mail: [leehejo@gmail.com](mailto:leehejo@gmail.com)

Janghee Choi, Industrial Transformation Technology Department, Research Institute of Sustainable Development Technology, Korea Institute of Industrial Technology, 89, Yangdaegiro-gil, Ipjang-myeon, Seobuk-gu, Cheonan-Si, Chungcheongnam-do 31056, Republic of Korea

E-mail: [cjh@kitech.re.kr](mailto:cjh@kitech.re.kr)

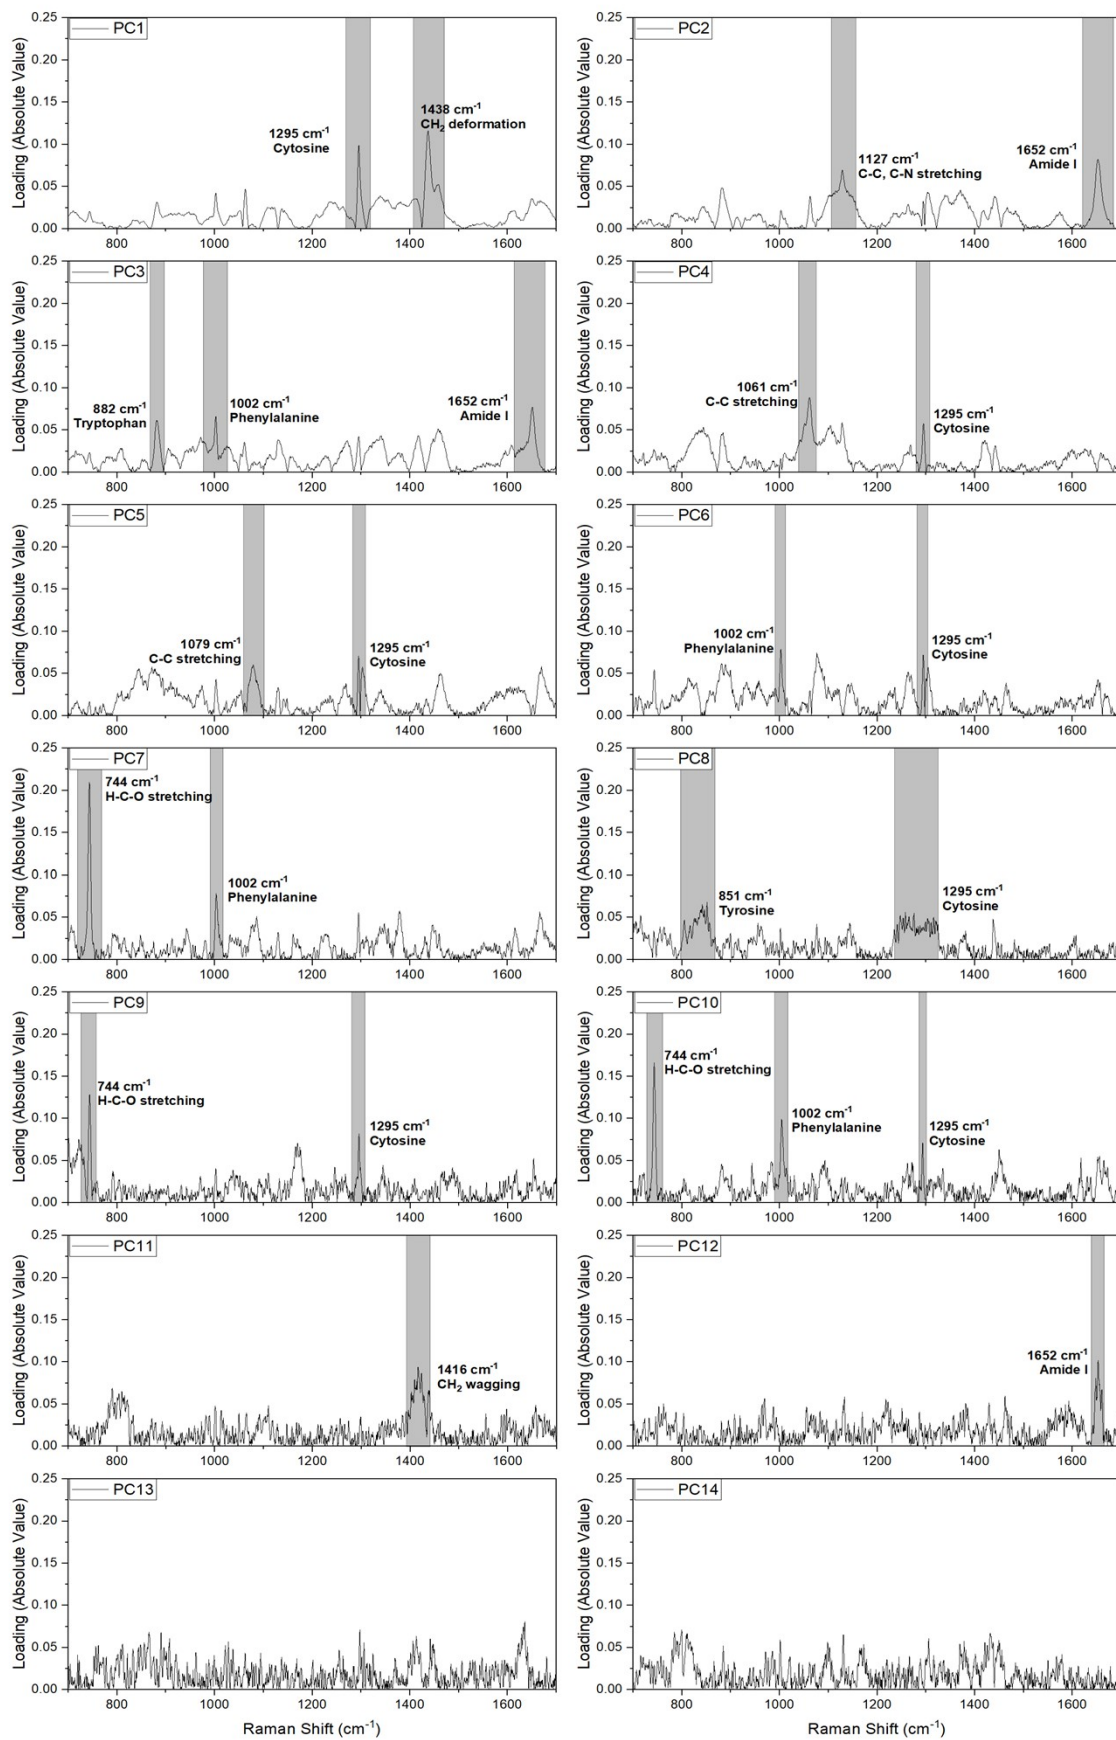

FIG

URE S1. The loading plots of the principal components for the Raman spectra of the samples.

| Ground truth | LIBS     |              |              |                   | Raman    |              |              |                   | Fusion model      |
|--------------|----------|--------------|--------------|-------------------|----------|--------------|--------------|-------------------|-------------------|
|              | Control  | <i>Gyr A</i> | <i>Gyr B</i> | Prediction result | Control  | <i>Gyr A</i> | <i>Gyr B</i> | Prediction result | Prediction result |
| Control      | 0.888367 | 0.068291     | 0.043342     | Control           | 0.436609 | 0.227114     | 0.336277     | Control           | Control           |
| Control      | 0.704504 | 0.236775     | 0.05872      | Control           | 0.853505 | 0.058979     | 0.087516     | Control           | Control           |
| Control      | 0.66474  | 0.26935      | 0.065909     | Control           | 0.987077 | 0.008325     | 0.004599     | Control           | Control           |
| Control      | 0.821866 | 0.134258     | 0.043876     | Control           | 0.985765 | 0.012965     | 0.00127      | Control           | Control           |
| Control      | 0.919178 | 0.058729     | 0.022093     | Control           | 0.73819  | 0.173335     | 0.088476     | Control           | Control           |
| Control      | 0.549346 | 0.415994     | 0.034661     | Control           | 0.928299 | 0.035284     | 0.036417     | Control           | Control           |
| Control      | 0.790227 | 0.17056      | 0.039213     | Control           | 0.963231 | 0.013251     | 0.023518     | Control           | Control           |
| Control      | 0.359267 | 0.612857     | 0.027876     | <i>Gyr A</i>      | 0.796706 | 0.119775     | 0.083519     | Control           | Control           |
| Control      | 0.741499 | 0.225746     | 0.032755     | Control           | 0.905821 | 0.049857     | 0.044322     | Control           | Control           |
| Control      | 0.543043 | 0.42653      | 0.030428     | Control           | 0.681307 | 0.108273     | 0.21042      | Control           | Control           |
| Control      | 0.831542 | 0.145237     | 0.023221     | Control           | 0.594109 | 0.350347     | 0.055545     | Control           | Control           |
| Control      | 0.701223 | 0.290233     | 0.008544     | Control           | 0.986579 | 0.008593     | 0.004828     | Control           | Control           |
| Control      | 0.36996  | 0.588502     | 0.041538     | <i>Gyr A</i>      | 0.743564 | 0.183197     | 0.07324      | Control           | Control           |
| Control      | 0.230911 | 0.712822     | 0.056267     | <i>Gyr A</i>      | 0.984929 | 0.010734     | 0.004336     | Control           | Control           |
| Control      | 0.808284 | 0.161933     | 0.029782     | Control           | 0.99218  | 0.004397     | 0.003423     | Control           | Control           |
| Control      | 0.313056 | 0.315103     | 0.371842     | Control           | 0.921533 | 0.043115     | 0.035353     | Control           | Control           |
| Control      | 0.177093 | 0.744585     | 0.078322     | <i>Gyr A</i>      | 0.87034  | 0.042313     | 0.087347     | Control           | Control           |
| Control      | 0.618393 | 0.35703      | 0.024578     | Control           | 0.882018 | 0.040937     | 0.077046     | Control           | Control           |
| Control      | 0.69676  | 0.281015     | 0.022224     | Control           | 0.980736 | 0.010347     | 0.008917     | Control           | Control           |
| Control      | 0.387454 | 0.560084     | 0.052462     | <i>Gyr A</i>      | 0.447403 | 0.236982     | 0.315614     | Control           | Control           |
| <i>gyrA</i>  | 0.167414 | 0.791645     | 0.04094      | <i>Gyr A</i>      | 0.001853 | 0.694202     | 0.303945     | <i>Gyr A</i>      | <i>Gyr A</i>      |
| <i>gyrA</i>  | 0.264245 | 0.676642     | 0.059113     | <i>Gyr A</i>      | 0.023365 | 0.221305     | 0.755331     | <i>Gyr B</i>      | <i>Gyr A</i>      |
| <i>gyrA</i>  | 0.721112 | 0.224272     | 0.054616     | Control           | 0.001358 | 0.660233     | 0.338409     | <i>Gyr A</i>      | <i>Gyr A</i>      |
| <i>gyrA</i>  | 0.309918 | 0.63197      | 0.058112     | <i>Gyr A</i>      | 0.364354 | 0.21313      | 0.422515     | <i>Gyr B</i>      | <i>Gyr A</i>      |
| <i>gyrA</i>  | 0.021406 | 0.930457     | 0.048137     | <i>Gyr A</i>      | 0.000593 | 0.575374     | 0.424033     | <i>Gyr A</i>      | <i>Gyr A</i>      |
| <i>gyrA</i>  | 0.016131 | 0.910695     | 0.073174     | <i>Gyr A</i>      | 0.000699 | 0.551876     | 0.447425     | <i>Gyr A</i>      | <i>Gyr A</i>      |
| <i>gyrA</i>  | 0.267757 | 0.708559     | 0.023684     | <i>Gyr A</i>      | 0.082306 | 0.493738     | 0.423956     | <i>Gyr A</i>      | <i>Gyr A</i>      |
| <i>gyrA</i>  | 0.200563 | 0.696552     | 0.102886     | <i>Gyr A</i>      | 0.043869 | 0.946313     | 0.009817     | <i>Gyr A</i>      | <i>Gyr A</i>      |
| <i>gyrA</i>  | 0.231198 | 0.510485     | 0.258317     | <i>Gyr A</i>      | 0.000631 | 0.692285     | 0.307084     | <i>Gyr A</i>      | <i>Gyr A</i>      |
| <i>gyrA</i>  | 0.402096 | 0.471142     | 0.126763     | <i>Gyr A</i>      | 0.083358 | 0.441327     | 0.475315     | <i>Gyr B</i>      | <i>Gyr A</i>      |
| <i>gyrA</i>  | 0.083621 | 0.898931     | 0.017448     | <i>Gyr A</i>      | 0.078593 | 0.761591     | 0.159816     | <i>Gyr A</i>      | <i>Gyr A</i>      |
| <i>gyrA</i>  | 0.012724 | 0.184093     | 0.803182     | <i>Gyr B</i>      | 0.003071 | 0.988563     | 0.008366     | <i>Gyr A</i>      | <i>Gyr A</i>      |
| <i>gyrA</i>  | 0.630496 | 0.338182     | 0.031322     | Control           | 0.080396 | 0.844091     | 0.075513     | <i>Gyr A</i>      | <i>Gyr A</i>      |
| <i>gyrA</i>  | 0.856189 | 0.129617     | 0.014193     | Control           | 0.209291 | 0.51102      | 0.279689     | <i>Gyr A</i>      | Control           |
| <i>gyrA</i>  | 0.24531  | 0.695818     | 0.058872     | <i>Gyr A</i>      | 0.039522 | 0.916326     | 0.044152     | <i>Gyr A</i>      | <i>Gyr A</i>      |
| <i>gyrA</i>  | 0.393436 | 0.534797     | 0.071768     | <i>Gyr A</i>      | 0.107034 | 0.644966     | 0.247999     | <i>Gyr A</i>      | <i>Gyr A</i>      |
| <i>gyrA</i>  | 0.291194 | 0.639548     | 0.069258     | <i>Gyr A</i>      | 0.005804 | 0.778165     | 0.216032     | <i>Gyr A</i>      | <i>Gyr A</i>      |

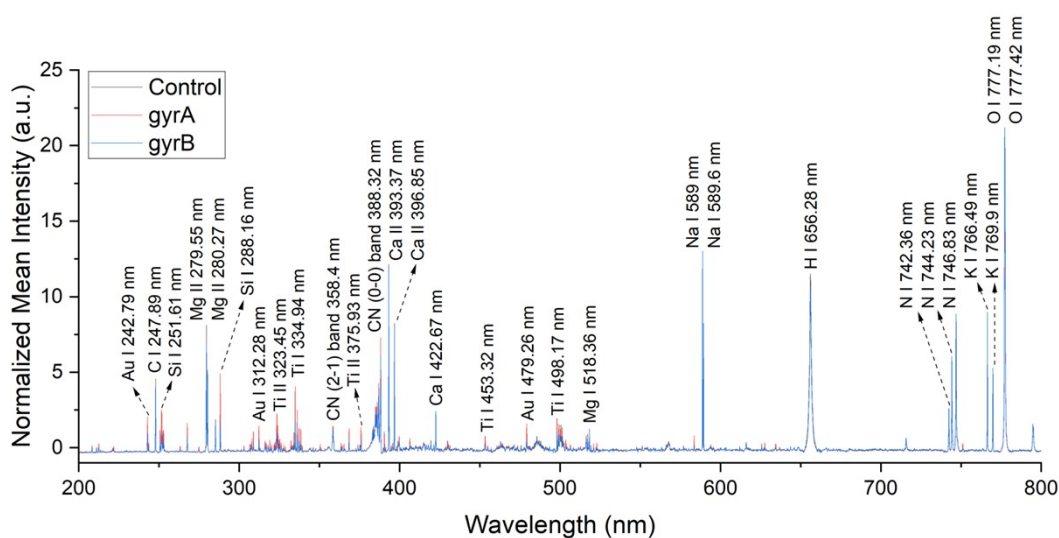

FIGURE S2. The normalized mean LIBS spectra for each sample.

|             |          |          |          |              |          |          |          |              |              |
|-------------|----------|----------|----------|--------------|----------|----------|----------|--------------|--------------|
| <i>gyrA</i> | 0.400698 | 0.506356 | 0.092946 | <i>Gyr A</i> | 0.053138 | 0.825617 | 0.121245 | <i>Gyr A</i> | <i>Gyr A</i> |
| <i>gyrA</i> | 0.433741 | 0.490466 | 0.075793 | <i>Gyr A</i> | 0.077366 | 0.483662 | 0.438973 | <i>Gyr A</i> | <i>Gyr A</i> |
| <i>gyrA</i> | 0.091027 | 0.871019 | 0.037954 | <i>Gyr A</i> | 0.03476  | 0.957947 | 0.007294 | <i>Gyr A</i> | <i>Gyr A</i> |
| <i>gyrB</i> | 0.112683 | 0.334871 | 0.552445 | <i>Gyr B</i> | 0.023653 | 0.169152 | 0.807195 | <i>Gyr B</i> | <i>Gyr B</i> |
| <i>gyrB</i> | 0.012216 | 0.031103 | 0.956681 | <i>Gyr B</i> | 0.140884 | 0.403713 | 0.455404 | <i>Gyr B</i> | <i>Gyr B</i> |
| <i>gyrB</i> | 0.156169 | 0.259372 | 0.584458 | <i>Gyr B</i> | 0.00115  | 0.431963 | 0.566887 | <i>Gyr B</i> | <i>Gyr B</i> |
| <i>gyrB</i> | 0.231881 | 0.139707 | 0.628412 | <i>Gyr B</i> | 0.019556 | 0.241658 | 0.738786 | <i>Gyr B</i> | <i>Gyr B</i> |
| <i>gyrB</i> | 0.030228 | 0.272312 | 0.69746  | <i>Gyr B</i> | 0.006364 | 0.631784 | 0.361852 | <i>Gyr A</i> | <i>Gyr B</i> |
| <i>gyrB</i> | 0.36963  | 0.460177 | 0.170193 | <i>Gyr A</i> | 0.08861  | 0.192044 | 0.719346 | <i>Gyr B</i> | <i>Gyr B</i> |
| <i>gyrB</i> | 0.007308 | 0.037667 | 0.955025 | <i>Gyr B</i> | 0.001108 | 0.449456 | 0.549436 | <i>Gyr B</i> | <i>Gyr B</i> |
| <i>gyrB</i> | 0.062411 | 0.155053 | 0.782536 | <i>Gyr B</i> | 0.0429   | 0.356622 | 0.600478 | <i>Gyr B</i> | <i>Gyr B</i> |
| <i>gyrB</i> | 0.006576 | 0.005707 | 0.987717 | <i>Gyr B</i> | 0.005208 | 0.291882 | 0.70291  | <i>Gyr B</i> | <i>Gyr B</i> |
| <i>gyrB</i> | 0.005687 | 0.003697 | 0.990616 | <i>Gyr B</i> | 0.240596 | 0.107358 | 0.652045 | <i>Gyr B</i> | <i>Gyr B</i> |
| <i>gyrB</i> | 0.060149 | 0.079849 | 0.860002 | <i>Gyr B</i> | 0.002435 | 0.62382  | 0.373745 | <i>Gyr A</i> | <i>Gyr B</i> |
| <i>gyrB</i> | 0.038515 | 0.2332   | 0.728285 | <i>Gyr B</i> | 0.066259 | 0.152731 | 0.78101  | <i>Gyr B</i> | <i>Gyr B</i> |
| <i>gyrB</i> | 0.016277 | 0.009005 | 0.974717 | <i>Gyr B</i> | 0.01282  | 0.178054 | 0.809126 | <i>Gyr B</i> | <i>Gyr B</i> |
| <i>gyrB</i> | 0.034796 | 0.355524 | 0.60968  | <i>Gyr B</i> | 0.137232 | 0.193903 | 0.668865 | <i>Gyr B</i> | <i>Gyr B</i> |
| <i>gyrB</i> | 0.009405 | 0.012877 | 0.977718 | <i>Gyr B</i> | 0.130614 | 0.243741 | 0.625645 | <i>Gyr B</i> | <i>Gyr B</i> |
| <i>gyrB</i> | 0.016411 | 0.655215 | 0.328374 | <i>Gyr A</i> | 0.036245 | 0.280374 | 0.683382 | <i>Gyr B</i> | <i>Gyr B</i> |
| <i>gyrB</i> | 0.022857 | 0.074297 | 0.902845 | <i>Gyr B</i> | 0.060166 | 0.282981 | 0.656853 | <i>Gyr B</i> | <i>Gyr B</i> |
| <i>gyrB</i> | 0.004241 | 0.005554 | 0.990205 | <i>Gyr B</i> | 0.015584 | 0.280586 | 0.70383  | <i>Gyr B</i> | <i>Gyr B</i> |
| <i>gyrB</i> | 0.078993 | 0.337363 | 0.583644 | <i>Gyr B</i> | 0.248302 | 0.314028 | 0.43767  | <i>Gyr B</i> | <i>Gyr B</i> |
| <i>gyrB</i> | 0.127667 | 0.368539 | 0.503794 | <i>Gyr B</i> | 0.098254 | 0.311991 | 0.589755 | <i>Gyr B</i> | <i>Gyr B</i> |

**Table S1.** The probabilities derived from each model and the resulting prediction
